# Supplementary material for: Azine based AIEgens with multi-stimuli response towards picric acid
Source: Royal Society of Chemistry journal article supplement (doi:10.1039/d0nj01324b), 2020-01-01
Supplement: d0nj01324b1.pdf [file d0nj01324b1.pdf]

## Electronic Supplementary Information for New Journal of Chemistry

### **Azine based AIEgens with multi-stimuli response towards picric acid**

Munusamy Sathiyaraj<sup>a</sup>, Kumaravelu Pavithra<sup>a</sup> and Viruthachalam Thiagarajan<sup>a\*</sup>

<sup>a</sup>School of Chemistry, Bharathidasan University, Tiruchirappalli-620 024, India

E-mail: [v.thiagarajan@bdu.ac.in](mailto:v.thiagarajan@bdu.ac.in); [vthiags@gmail.com](mailto:vthiags@gmail.com)

## Table of Content

1. **Table S1.** Photophysical properties of azine derivatives in various solvents
2. **Table S2.** Photophysical properties of azine derivatives in the aggregated form
3. **Figure S1.** Absorption spectra of azine derivatives in different fraction of THF- water mixture
4. **Figure S2.** Emission spectra of azine derivatives in different fraction of THF- water mixture
5. **Figure S3.** Absorption and emission spectrum of different fraction of methanol-glycerol mixture
6. **Figure S4.** Absorption spectra of azine derivatives in the presence and absence of picric acid in THF
7. **Figure S5.** Emission spectra of azine derivatives in the presence and absence of picric acid in THF
8. **Figure S6.** Absorption and emission spectra of DMBA in the presence and absence of different explosive compounds in THF
9. **Table S3.** Photophysical data of azine derivatives in the presence and absence of picric acid in THF.
10. **Figure S7.** HOMO-LUMO gap and orbital distribution of the HOMO and LUMO for azine derivatives
11. **Table S4.** Theoretical band gap data of DMBA in vacuum and THF in comparison with experimentally observed values
12. **Figure S8.** <sup>1</sup>HNMR spectra of DMBA before and after addition of picric acid
13. **Figure S9.** Absorption spectrum of BA in the presence and absence of picric acid in THF
14. **Figure S10.** Emission spectrum of DMBA in the presence of higher concentration of picric acid in THF/water (3:7) mixture.
15. **Table S5.** Photophysical data of azine derivatives in the presence and absence of picric acid in THF/water (3:7) mixture
16. **Figure S11.** Absorption spectra of azine derivatives in the presence and absence of picric acid in THF/water (3:7) mixture
17. **Figure S12.** Emission spectra of azine derivatives in the presence and absence of picric acid in THF/water (3:7) mixture

18. **Figure S13.** Absorption and emission spectra of DMBA in the presence and absence of different explosive compounds in THF/water (3:7) mixture
19. **Figure S14.** Absorption spectrum of BA in the presence and absence of picric acid in THF/water (3:7) mixture
20. **Figure S15.** Absorption spectrum of BA in different pH in THF/water (3:7) mixture.
21. **Figure S16.** Absorption spectrum of DABA in different pH in THF/water (3:7) mixture.
22. Determination of quantum yield, detection limit, lifetime measurement and synthetic procedure for azine derivatives
23. **Figure S17- S31.** NMR and HRMS data for all the azine derivatives

**Table S1.** Photophysical data of different azine derivatives in various solvents

| Compound | BA                             |                               |                                          | DMBA                           |                               |                                          | DEBA                           |                               |                                          | DPBA                           |                               |                                          | DAPA                           |                               |                                          |
|----------|--------------------------------|-------------------------------|------------------------------------------|--------------------------------|-------------------------------|------------------------------------------|--------------------------------|-------------------------------|------------------------------------------|--------------------------------|-------------------------------|------------------------------------------|--------------------------------|-------------------------------|------------------------------------------|
|          | $\lambda_{\text{abs}}$<br>(nm) | $\lambda_{\text{em}}$<br>(nm) | Stoke's<br>shift<br>( $\text{cm}^{-1}$ ) |
| Toluene  | 302                            | -                             | -                                        | 386                            | 466                           | 4447                                     | 391                            | 486                           | 4999                                     | 394                            | 470                           | 4104                                     | 406                            | 483                           | 3927                                     |
| DCM      | 301                            | -                             | -                                        | 388                            | 479                           | 4897                                     | 397                            | 473                           | 4047                                     | 399                            | 476                           | 4054                                     | 407                            | 500                           | 4570                                     |
| THF      | 300                            | -                             | -                                        | 384                            | 467                           | 4628                                     | 390                            | 471                           | 4410                                     | 392                            | 473                           | 4369                                     | 402                            | 482                           | 4129                                     |
| MeOH     | 304                            | -                             | -                                        | 392                            | 483                           | 4807                                     | 401                            | 486                           | 4361                                     | 403                            | 476                           | 3805                                     | 406                            | 524                           | 5547                                     |
| ACN      | 298                            | -                             | -                                        | 387                            | 477                           | 4875                                     | 393                            | 476                           | 4437                                     | 396                            | 488                           | 4761                                     | 400                            | 510                           | 5393                                     |
| DMF      | 303                            | -                             | -                                        | 392                            | 465                           | 4005                                     | 398                            | 479                           | 4249                                     | 400                            | 481                           | 4210                                     | 406                            | 504                           | 4789                                     |
| DMSO     | 304                            | -                             | -                                        | 395                            | 477                           | 4352                                     | 401                            | 482                           | 4191                                     | 404                            | 483                           | 4049                                     | 408                            | 510                           | 4902                                     |

## Aggregation Induced Emission studies:

**Table S2.** Photophysical data of azine derivatives in the aggregated form (THF-water mixture)

| Compounds | $\lambda_{\text{abs max}}$ (nm) | $\lambda_{\text{em max}}$ (nm) | $\Phi_{\text{F}}^{\text{a}}$ In AIE form | Fluorescence enhancement due to AIE (fold) |
|-----------|---------------------------------|--------------------------------|------------------------------------------|--------------------------------------------|
| DMBA      | 401                             | 496                            | 0.0525                                   | 1923                                       |
| DEBA      | 410                             | 494                            | 0.0729                                   | 1082                                       |
| DPBA      | 410                             | 487                            | 0.0497                                   | 461                                        |
| DABA      | 411                             | 525                            | 0.0327                                   | 77                                         |

<sup>a</sup> Quantum yield measured at THF-water mixture having maximum fluorescence enhancement

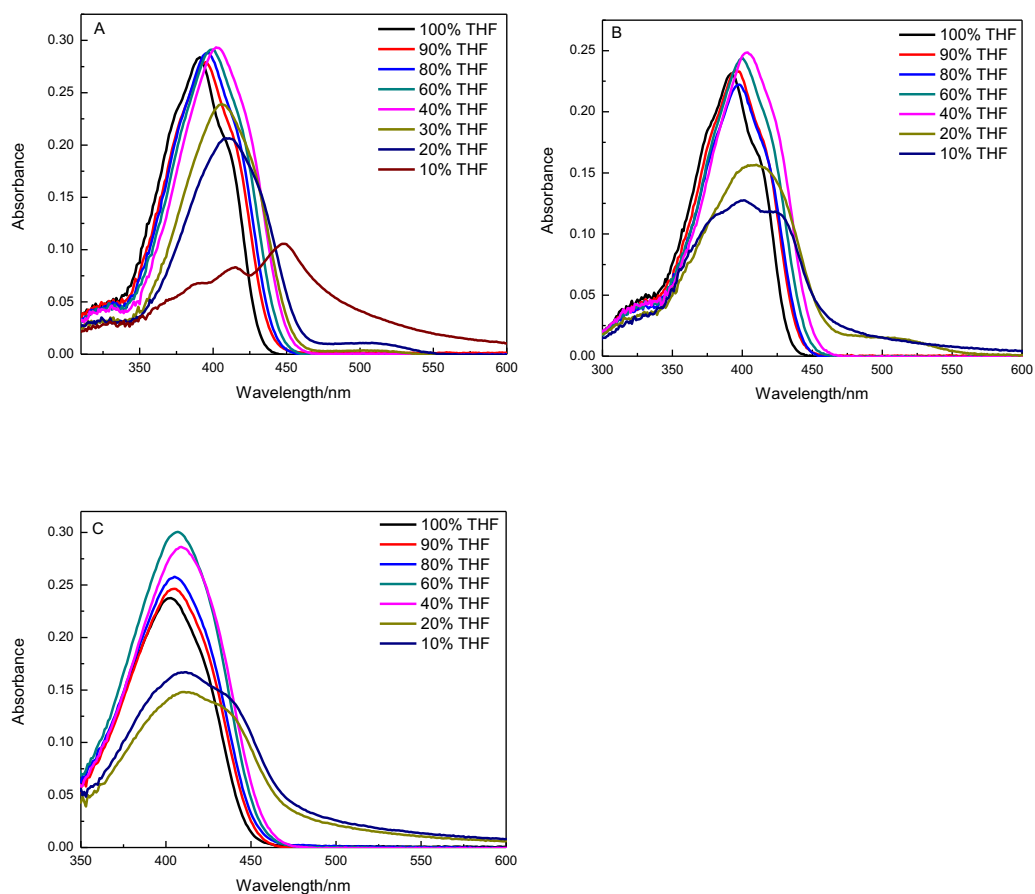

**Figure S1.** Absorption spectra of azine derivatives (5  $\mu\text{M}$ ) in different fraction of THF- water mixture. (A) DEBA; (B) DPBA and (C) DABA

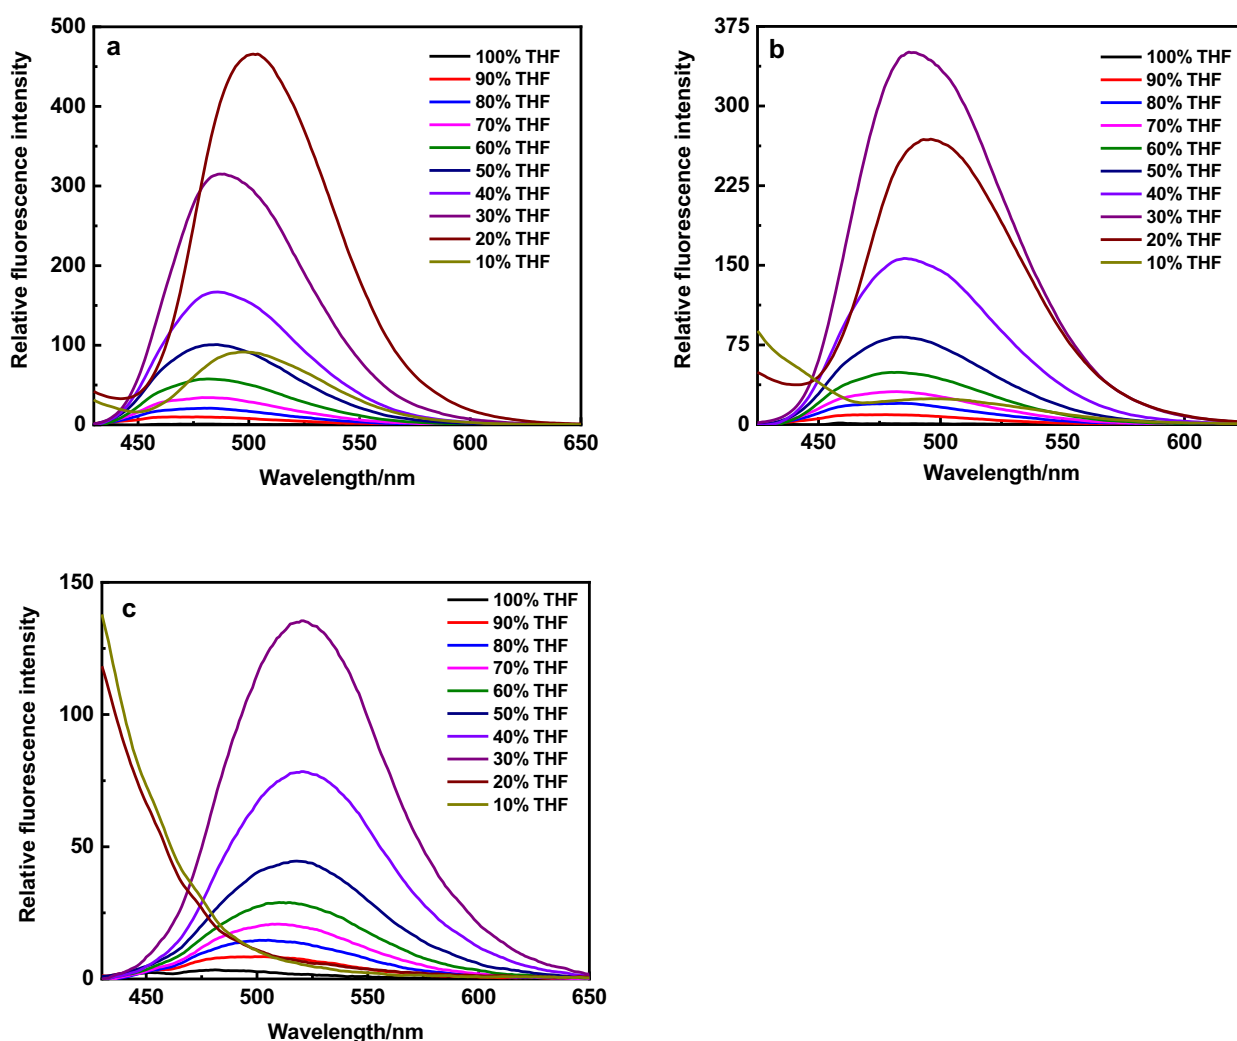

**Figure S2.** Emission spectra of azine derivatives (5  $\mu$ M) in different fraction of THF- water mixture. (a) DEBA( $\lambda_{exc} = 392$  nm); (b) DPBA( $\lambda_{exc} = 392$  nm) and (c) DABA( $\lambda_{exc} = 403$  nm)

### Restricted intramolecular rotation mechanism

To analyse the influence of viscosity on the azine derivatives, the fluorescence studies were carried out in methanol containing varying percentages of glycerol (Figure S3). The absorption spectrum shows a decrease in absorbance at the 390 nm band along with the formation of a new band at 500 nm with a clear isosbestic point at 427 nm on increasing the glycerol percentage. The new absorption band at 500 nm is very similar to the protonated species. The emission spectra given in Figure S3 clearly shows the increase in the emission intensity along with a red shift as the percentage of glycerol increases. The increase in viscosity restricts the intramolecular rotations and this induces the radiative process which leads to the strong emission around 500 nm similar to one in the aggregated state. Increase in viscosity restricts

both the intramolecular rotation as well as aggregate formation which results in less fluorescence enhancement compared to enhancement with the 85% water fraction. In addition to that, self-quenching by protonated species may also decrease the fluorescence intensity. With viscosity studies, we can confirm that the restriction of intramolecular rotation leads to increase in fluorescence enhancement via a decrease in non-radiative deactivation pathways.

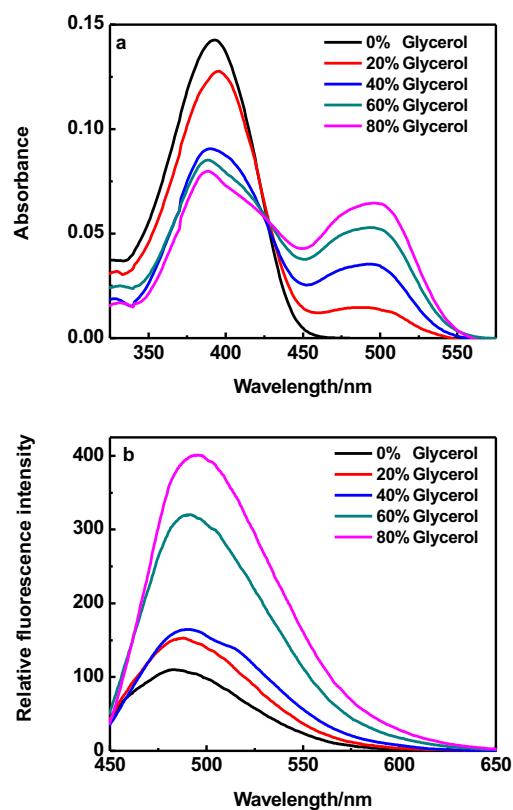

**Figure S3.** (a) Absorption and (b) emission spectrum of DMBA (10  $\mu$ M)  $\lambda_{exc}$  = 425 nm in methanol with varying percentage of glycerol.

## Picric acid detection in THF

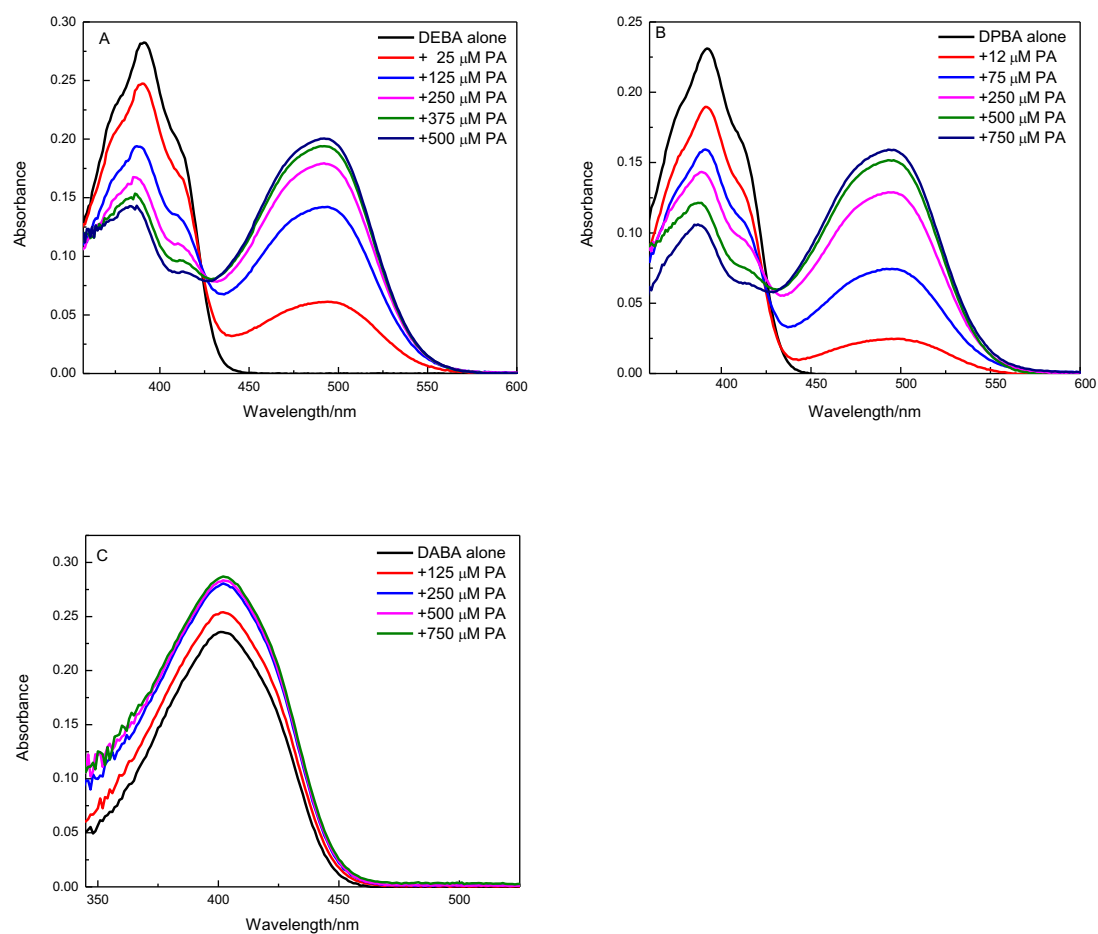

**Figure S4.** Absorption spectra of azine derivatives (5  $\mu\text{M}$ ) in the presence and absence of picric acid in pure THF. (A) DEBA; (B) DPBA and (C) DABA



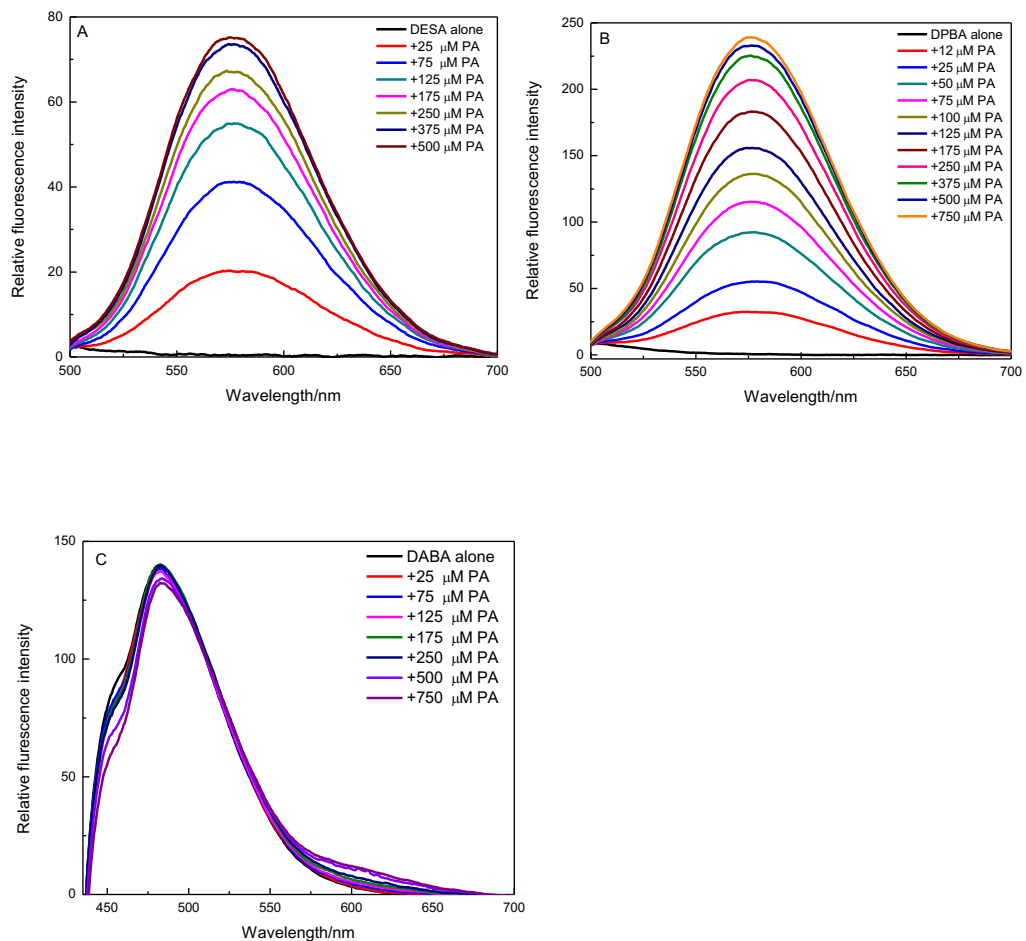

**Figure S5.** Emission spectra of azine derivatives (5  $\mu\text{M}$ ) in the presence and absence of picric acid in pure THF. (A) DEBA ( $\lambda_{\text{exc}} = 425 \text{ nm}$ ); (B) DPBA ( $\lambda_{\text{exc}} = 425 \text{ nm}$ ) and (C) DABA ( $\lambda_{\text{exc}} = 401 \text{ nm}$ ).

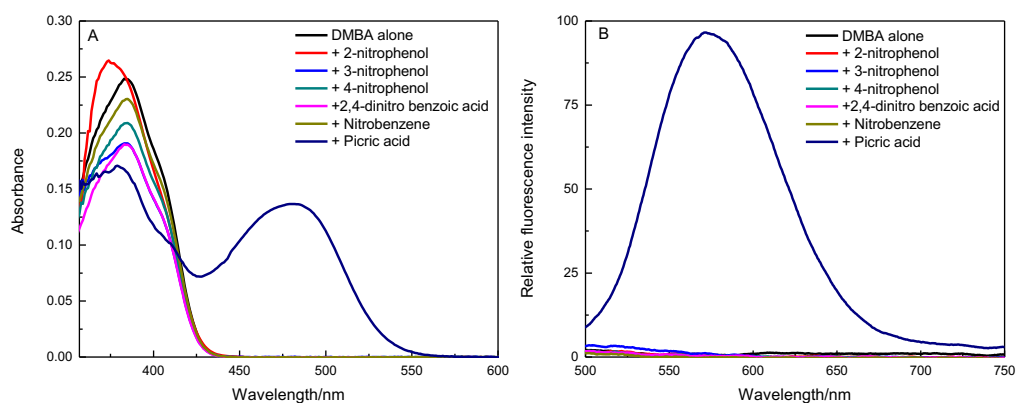

**Figure S6 .** Absorption (A) and emission (B) spectrum of DMBA (5  $\mu\text{M}$ ) in the absence and presence of 125 equivalents of different explosive compounds (625  $\mu\text{M}$ ) in THF,  $\lambda_{\text{exc}} = 415 \text{ nm}$ .

**Table S3.** Photophysical data of azine derivatives in the presence and absence of picric acid in THF.

| Compounds | $\lambda_{\text{absmax}}$ (nm) | $\lambda_{\text{emmax}}$ (nm) | Fluorescence enhancement in the presence of PA | Detection limit of PA |
|-----------|--------------------------------|-------------------------------|------------------------------------------------|-----------------------|
| DMBA      | 384, 480                       | 467, 574                      | 133                                            | 26 $\mu\text{M}$      |
| DEBA      | 390, 491                       | 471, 576                      | 171                                            | 44 $\mu\text{M}$      |
| DPBA      | 392, 493                       | 473, 577                      | 478                                            | 49 $\mu\text{M}$      |
| DABA      | 402                            | 482                           | -                                              | 0.6 mM                |

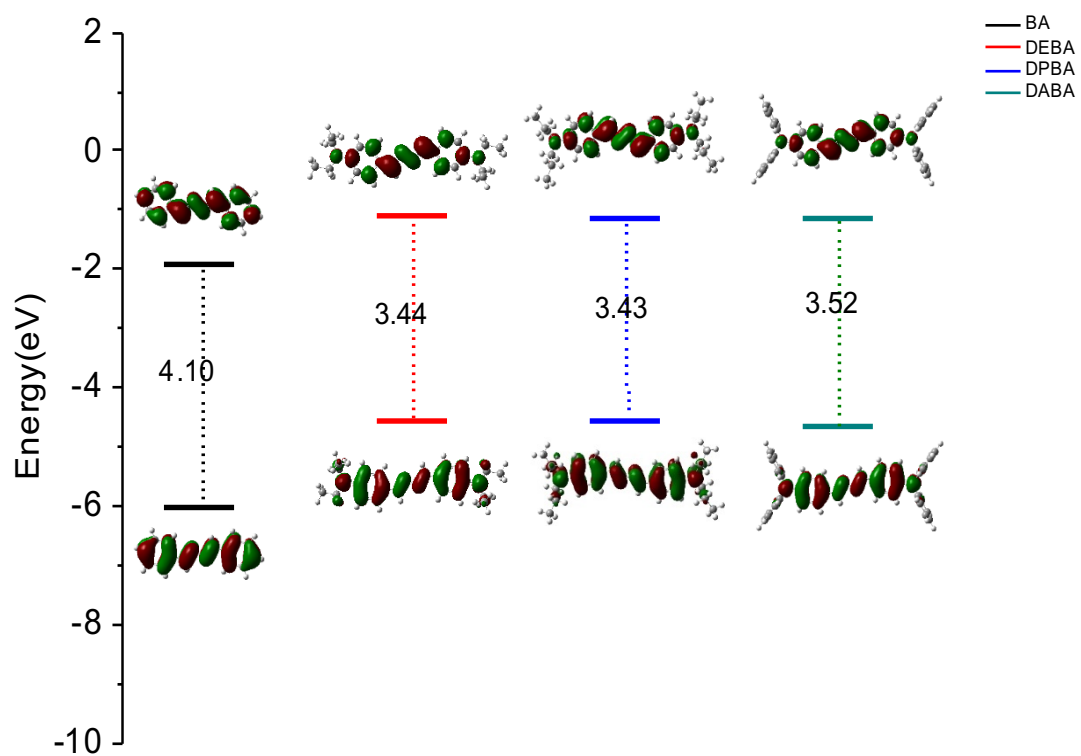

**Figure S7.** HOMO-LUMO gap and orbital distribution of the HOMO and LUMO for azine derivatives

**Table S4.** Theoretical band gap data of DMBA in vacuum and THF in comparison with the experimental values

| Azine molecule                     | Experimental band gap obtained from absorption spectrum (eV) | Theoretical band gap without counterion in vacuum (eV) | Theoretical band gap without counterion in THF (eV) | Theoretical band gap energy with chloride counterion in THF (eV)                |
|------------------------------------|--------------------------------------------------------------|--------------------------------------------------------|-----------------------------------------------------|---------------------------------------------------------------------------------|
| DMBA                               | 3.23                                                         | 3.45                                                   | 3.30                                                | -                                                                               |
| DMBA-H <sup>+</sup>                | 2.57                                                         | 2.49                                                   | 2.97                                                | 3.14<br>(DMBA-H <sup>+</sup> Cl <sup>-</sup> )                                  |
| <sup>+</sup> H-DMBA-H <sup>+</sup> | -                                                            | 4.14                                                   | 4.15                                                | 5.61<br>(Cl <sup>-</sup> H <sup>+</sup> -DMBA- H <sup>+</sup> Cl <sup>-</sup> ) |

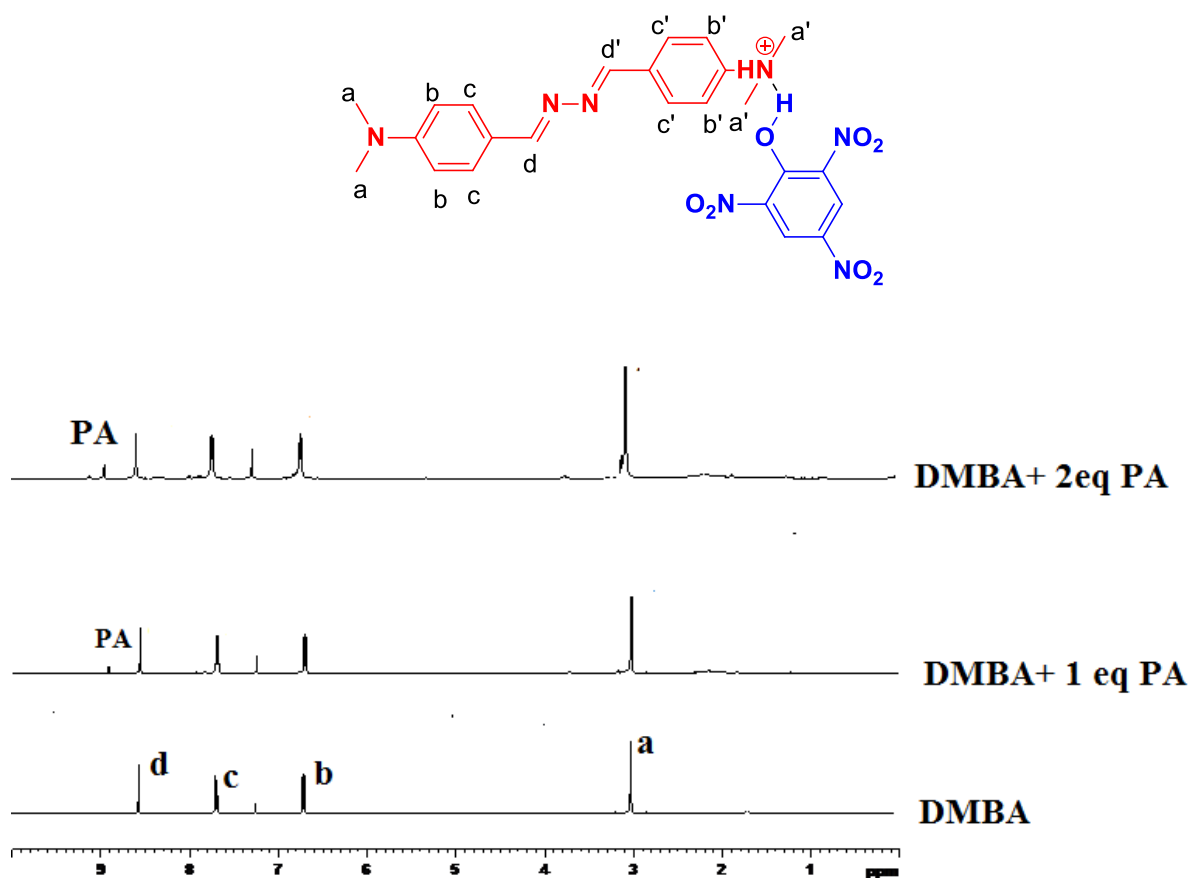

**Figure S8.** <sup>1</sup>H NMR spectra of DMBA before and after addition of picric acid

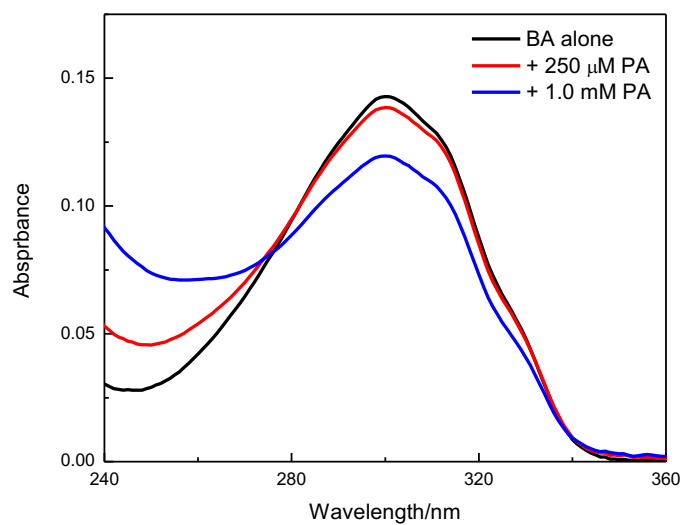

**Figure S9.** Absorption spectrum of BA (5  $\mu\text{M}$ ) in the presence and absence of picric acid in THF.

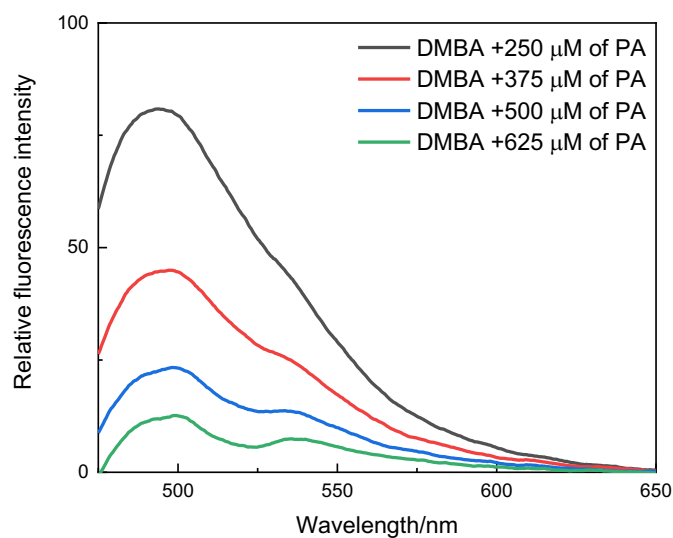

**Figure S10.** Emission spectrum of DMBA (5  $\mu\text{M}$ ) in the presence of higher concentration of picric acid in THF/water (3:7) mixture.

## PA detection in aqueous mixture:

**Table S5.** Photophysical data of azine derivatives in the presence and absence of picric acid in THF/water (3:7) mixture.

| Compounds | $\lambda_{\text{absmax}}$ (nm) | $\lambda_{\text{emmax}}$ (nm) | Detection limit of PA |
|-----------|--------------------------------|-------------------------------|-----------------------|
| DMBA      | 400, 495                       | 496                           | 38 $\mu\text{M}$      |
| DEBA      | 405, 500                       | 494                           | 76 $\mu\text{M}$      |
| DPBA      | 407, 504                       | 487                           | 46 $\mu\text{M}$      |
| DABA      | 415                            | 525                           | 138 $\mu\text{M}$     |

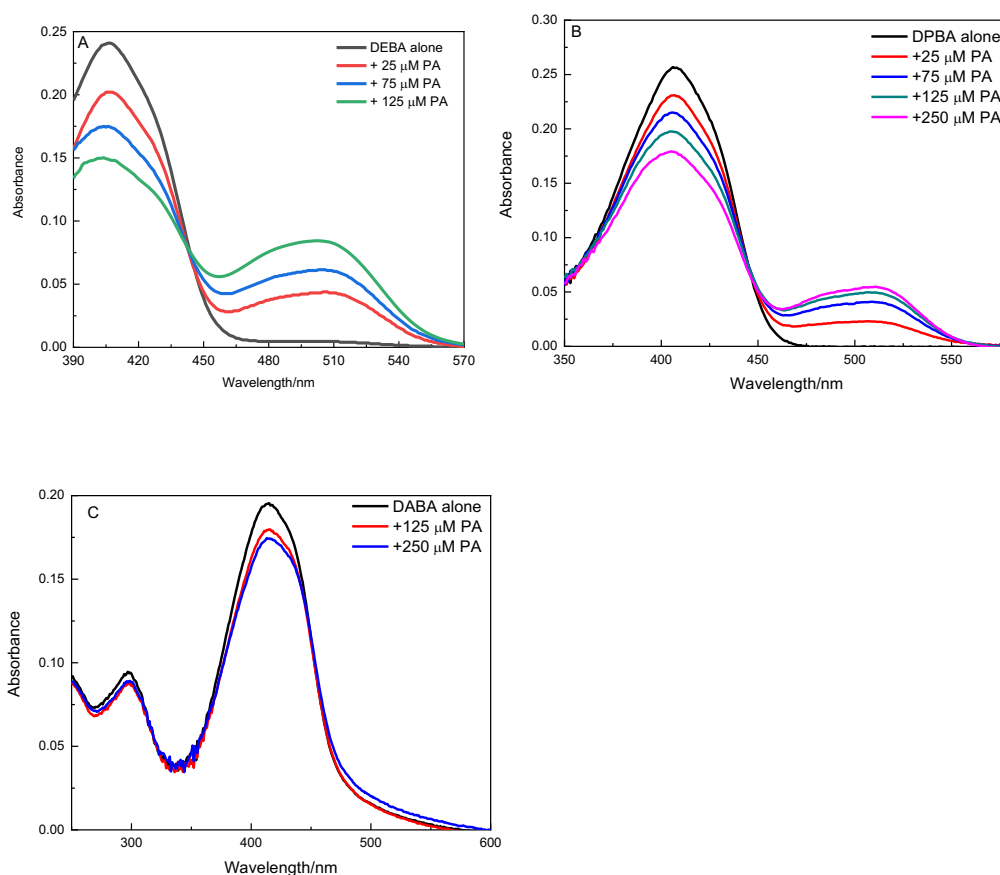

**Figure S11.** Absorption spectra of azine derivatives (5  $\mu\text{M}$ ) in the presence and absence of picric acid in THF/water (3:7) mixture. (A) DEBA; (B) DPBA and (C) DABA

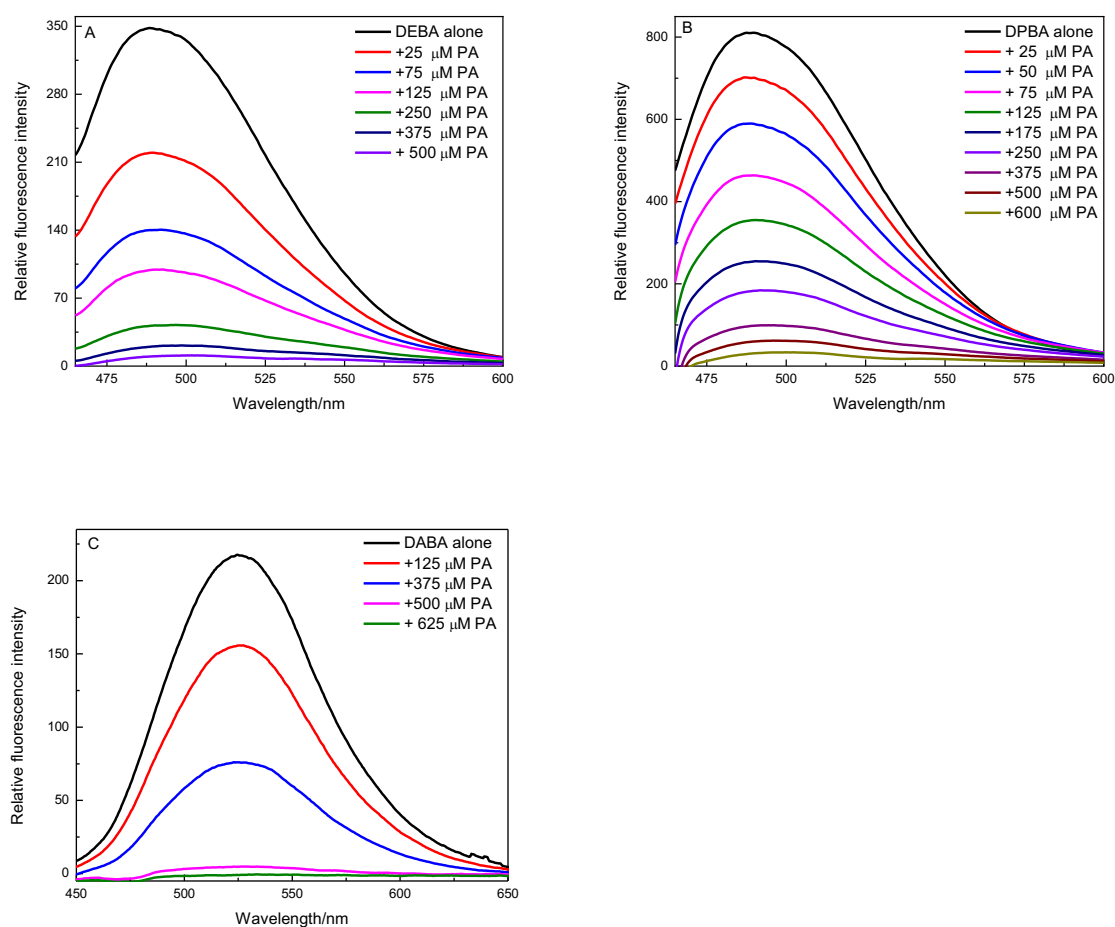

**Figure S12.** Emission spectra of azine derivatives (5  $\mu\text{M}$ ) in the presence and absence of picric acid in THF/water (3:7) mixture. (A) DEBA ( $\lambda_{\text{exc}} = 425 \text{ nm}$ ); (B) DPBA ( $\lambda_{\text{exc}} = 446 \text{ nm}$ ) and (C) DABA ( $\lambda_{\text{exc}} = 456 \text{ nm}$ )

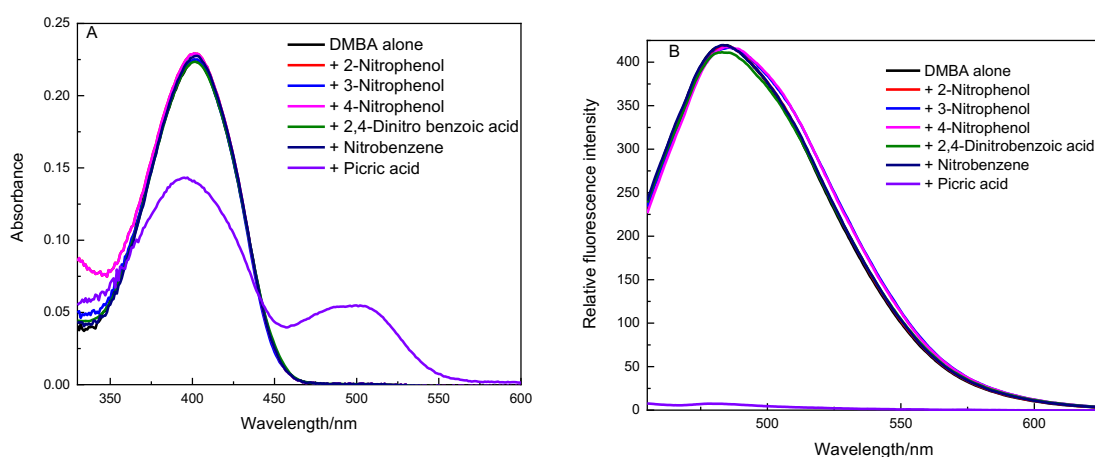

**Figure S13.** (A) Absorption and (B) emission spectrum of DMBA (5  $\mu\text{M}$ ) in the absence and presence of 125 equivalents of different explosive compounds (625  $\mu\text{M}$ ) in THF/water (3:7) mixture,  $\lambda_{\text{exc}} = 443 \text{ nm}$ .

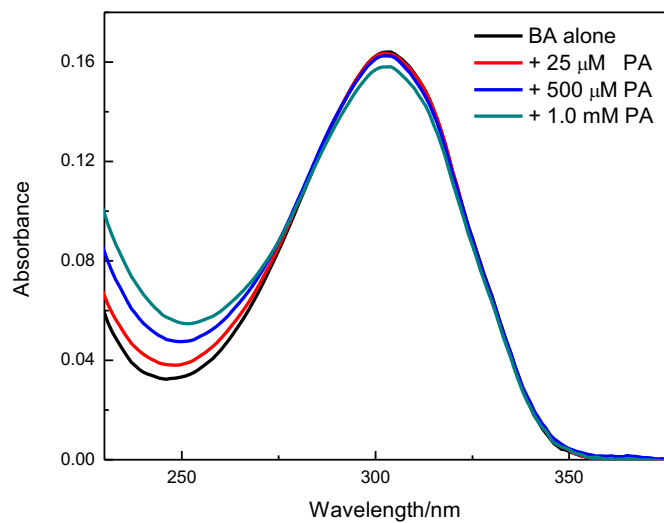

**Figure S14.** Absorption spectrum of BA (5 μM) in the presence and absence of picric acid in THF/water (3:7) mixture.

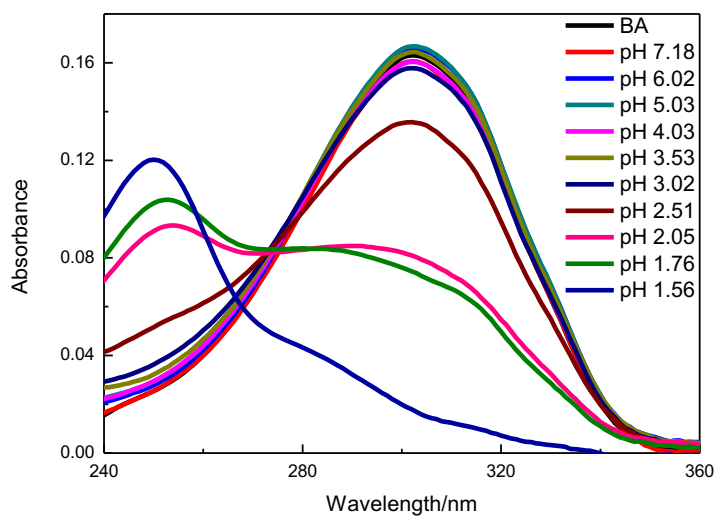

**Figure S15.** Absorption spectrum of BA (5 μM) in different pH in THF/water (3:7) mixture.

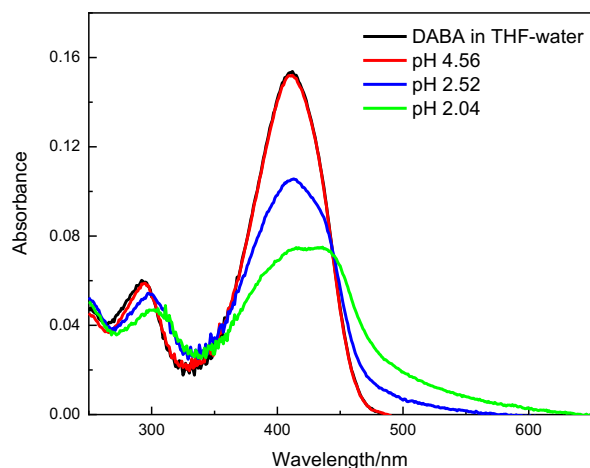

**Figure S16.** Absorption spectrum of DABA in different pH in THF/water (3:7) mixture.

### Determination of Fluorescent quantum yield

Fluorescence quantum yields were obtained from the corrected fluorescence spectra using the expression,

$$\Phi_f = (A_s/A_r) (a_s/a_r) (n_s / n_r)^2 \times 0.54$$

Where,  $A_s$  and  $A_r$  are the area under the corrected fluorescence spectrum,  $a_s$  and  $a_r$  are the absorbances at the wavelength of excitation, and  $n_s$  and  $n_r$  are the refractive indices of the solvent for the sample and reference, respectively. Quinine sulphate in 0.1 N sulphuric acid was used as the reference for the quantum yield determination ( $\Phi_f$  of quinine sulphate is 0.546).

### Limit of detection:

The limit of detection (LOD) of PA for azine molecules were calculated from a fluorescence titration using the earlier literature. To determine the S/N ratio, the fluorescence intensity of azine molecules without PA was measured ten times and the standard deviation of blank measurements was determined. The fluorescence intensity plot  $[I/I_0-1]$  varies linearly vs. the concentration of PA. The limit of detection was then calculated from the following equation,

$$\text{LOD} = 3\sigma/k$$



Where  $\sigma$  is the standard deviation of blank measurements,  $k$  is the slope obtained from the plot of  $[I/I_0-1]$  versus PA concentration.

### Fluorescence lifetime:

The fluorescence lifetime of azine derivatives were measured in pure THF and found to be in the order of 0.2 ns [DMBA(0.25), DEBA(0.28), DPBA(0.23) and DABA (0.24)]. The lifetime of azine derivatives in THF-water mixture and in the presence of picric acid were found to be shorter than the instrument response of our TCSPC instrument ( $> 150$  ps).

### Synthesis and characterization of azine derivatives:

Two equivalents of the corresponding aldehyde dissolved in 5mL of ethanol and then one equivalent of hydrazine monohydrate in ethanol was added dropwise along with stirring. The above reaction mixture was stirred for 6 h at 80 °C and then the formed product was filtered, washed several times with ethanol and dried. The final dried product was recrystallized using dichloromethane- ethanol mixture.

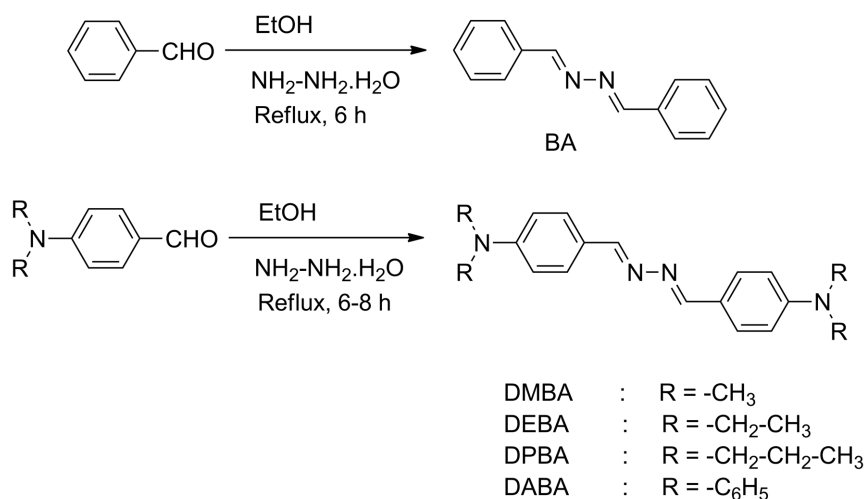

### BA

<sup>1</sup>H NMR (400 MHz, CDCl<sub>3</sub>)  $\delta$ : 8.67(s, 2H), 7.86(m, 4H), 7.46(m, 6H); <sup>13</sup>C NMR (400MHz, CDCl<sub>3</sub>)  $\delta$ : 162.13, 134.11, 131.25, 128.83, 128.60. HRMS (ESI-TOF)  $m/z$ :  $[M + H]^+$  Calcd for C<sub>14</sub>H<sub>13</sub>N<sub>2</sub> 209.1073; found: 209.1074.

### **DMBA**

$^1\text{H}$  NMR (400 MHz,  $\text{CDCl}_3$ )  $\delta$ : 8.57(s, 2H), 7.71(d, 4H), 6.72(d, 4H), 3.02(s, 12H);  $^{13}\text{C}$  NMR (400MHz,  $\text{CDCl}_3$ )  $\delta$ : 160.80, 152.12, 129.88, 122.25, 111.75, 40.20. HRMS (ESI-TOF) m/z:  $[\text{M} + \text{H}]^+$  Calcd for  $\text{C}_{18}\text{H}_{23}\text{N}_4$  295.1917; found: 295.1917.

### **DEBA**

$^1\text{H}$  NMR (400 MHz,  $\text{CDCl}_3$ )  $\delta$ : 8.56(s, 2H), 7.68(d, 4H), 6.68(d, 4H), 3.43(q, 4H), 1.21(t, 6H);  $^{13}\text{C}$  NMR (400MHz,  $\text{CDCl}_3$ )  $\delta$ : 160.58, 149.64, 130.14, 121.39, 111.13, 44.49, 12.65. HRMS (ESI-TOF) m/z:  $[\text{M} + \text{H}]^+$  Calcd for  $\text{C}_{22}\text{H}_{30}\text{N}_4$  350.2470; found: 350.2531.

### **DPBA**

$^1\text{H}$  NMR (400 MHz,  $\text{CDCl}_3$ )  $\delta$ : 8.54(s, 2H), 7.66(d, 4H), 6.65(d, 4H), 3.30(t, 8H), 1.68(m, 8H), 0.96(t, 12H);  $^{13}\text{C}$  NMR (400MHz,  $\text{CDCl}_3$ )  $\delta$ : 160.54, 150.08, 130.04, 121.30, 111.22, 52.82, 20.48, 11.45. HRMS (ESI-TOF) m/z:  $[\text{M} + \text{H}]^+$  Calcd for  $\text{C}_{26}\text{H}_{39}\text{N}_4$ , 407.3169; found: 401.3163.

### **DAPA**

$^1\text{H}$  NMR (400 MHz,  $\text{CDCl}_3$ )  $\delta$ : 8.59(s, 2H), 7.68(d, 4H), 7.32(m, 8H), 7.16(m, 16H);  $^{13}\text{C}$  NMR (400MHz,  $\text{CDCl}_3$ )  $\delta$ : 160.97, 150.50, 146.99, 129.58, 129.51, 127.27, 125.44, 124.01, 121.68. HRMS (ESI-TOF) m/z:  $[\text{M} + \text{H}]^+$  Calcd for  $\text{C}_{38}\text{H}_{31}\text{N}_4$ , 543.2543; found: 543.2543.

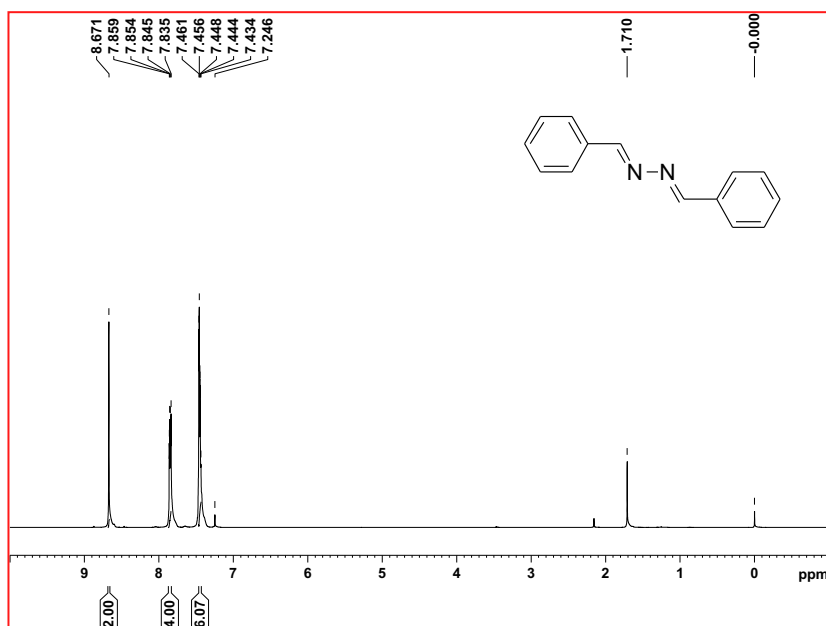

Figure S17.  $^1\text{H}$  NMR Spectrum of BA in  $\text{CDCl}_3$

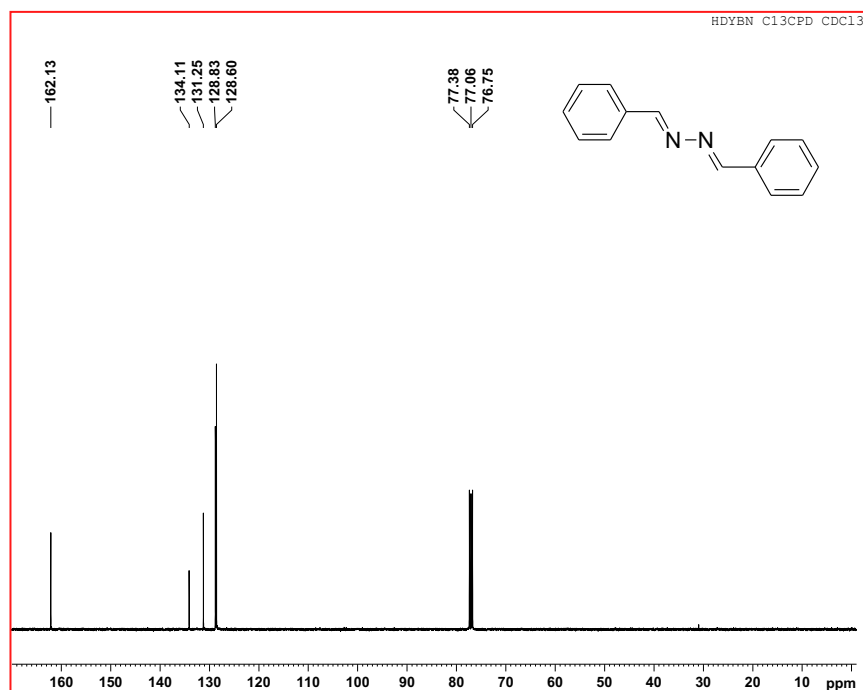

Figure S18.  $^{13}\text{C}$  NMR Spectrum of BA in  $\text{CDCl}_3$

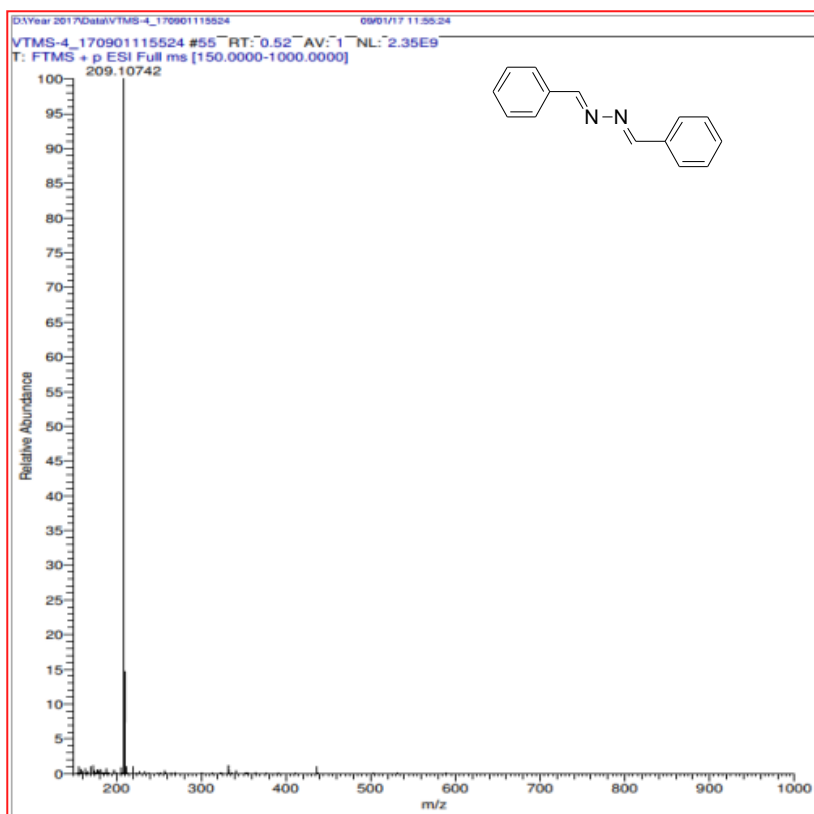

**Figure S19.** Mass Spectrum of BA

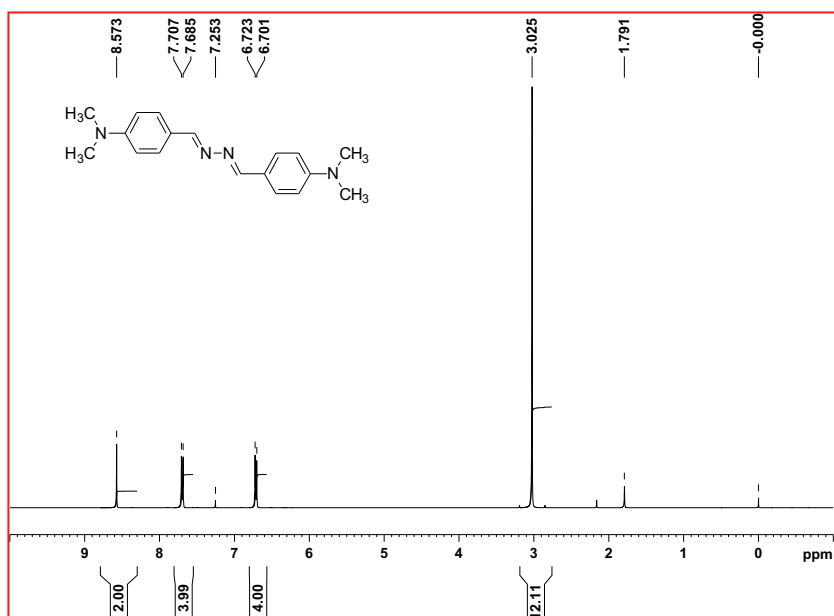

**Figure S20.**  $^1\text{H}$  NMR Spectrum of DMBA in  $\text{CDCl}_3$

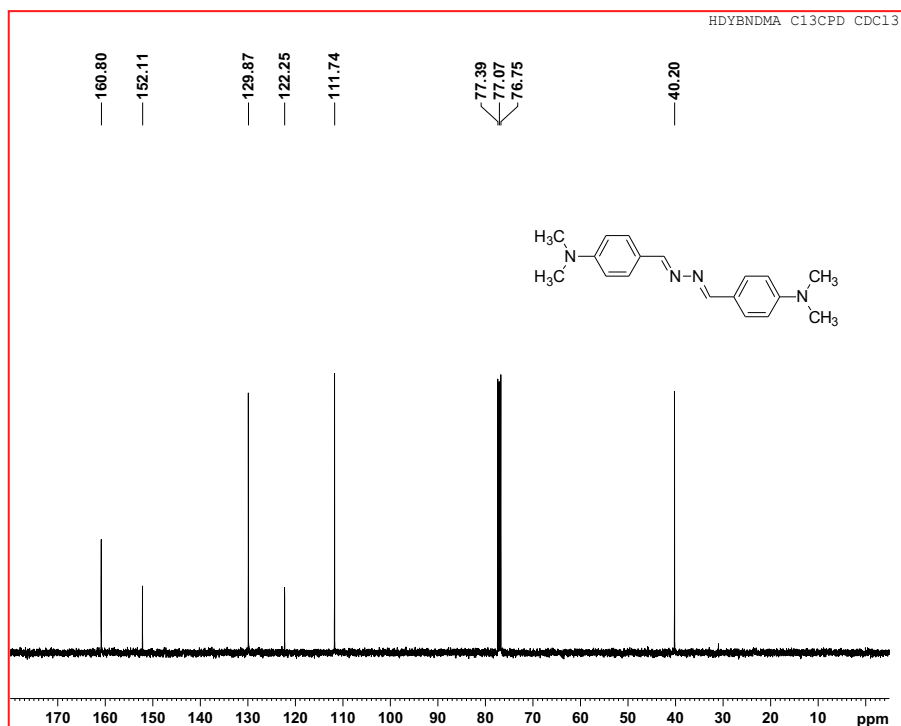

Figure S21.  $^{13}\text{C}$  NMR Spectrum of DMBA in  $\text{CDCl}_3$

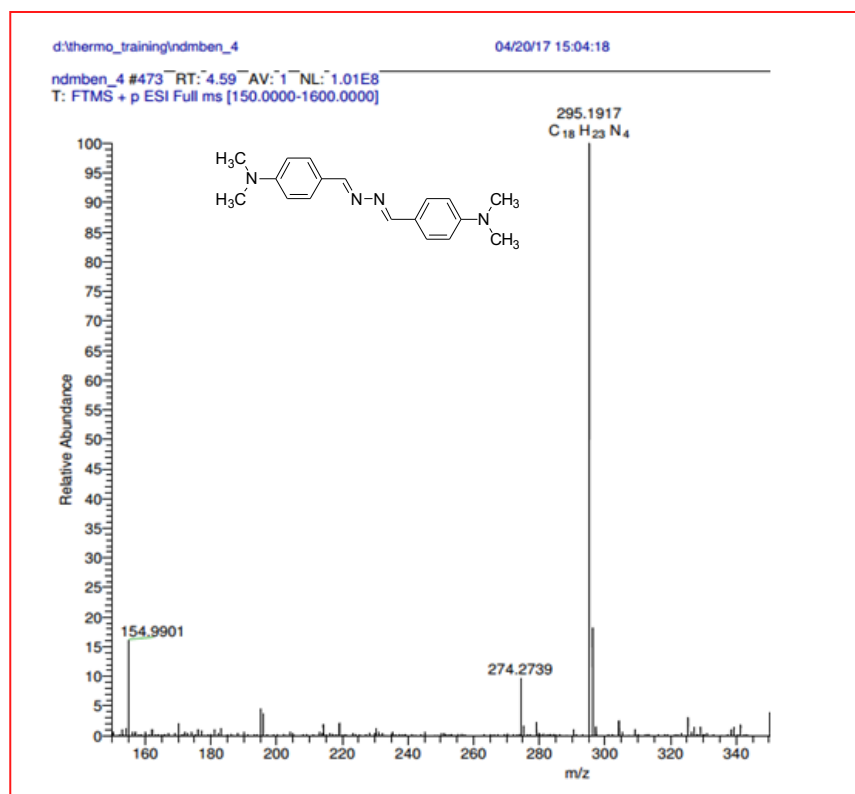

Figure S22. Mass Spectrum of DMBA

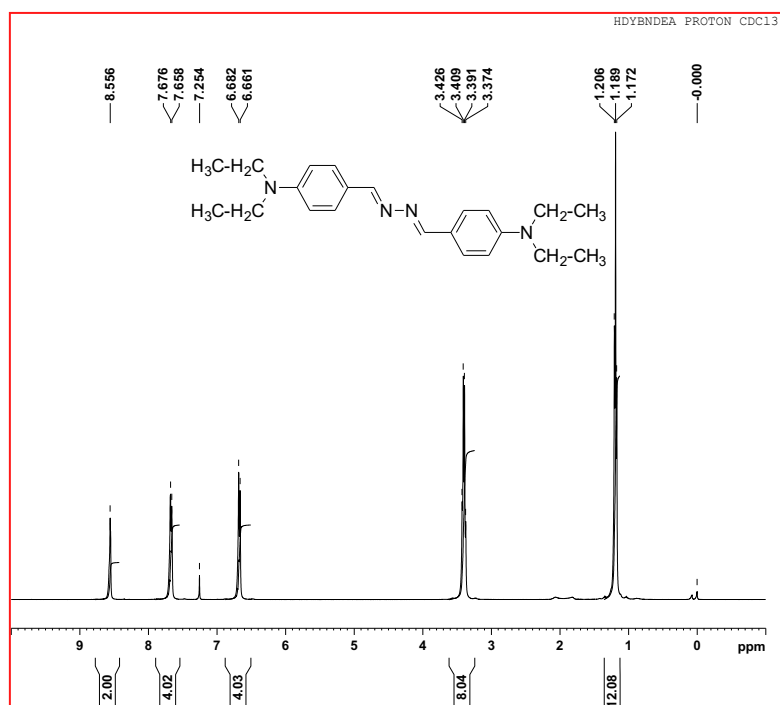

Figure S23.  $^1\text{H}$  NMR Spectrum of DEBA in  $\text{CDCl}_3$

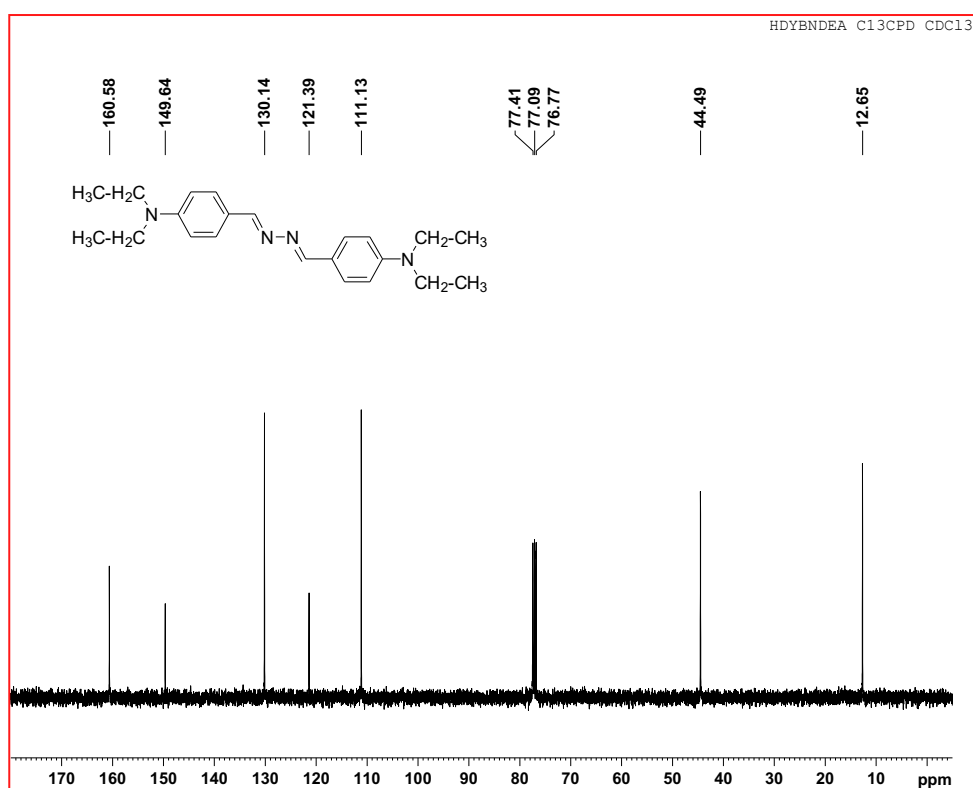

Figure S24.  $^{13}\text{C}$  NMR Spectrum of DEBA in  $\text{CDCl}_3$

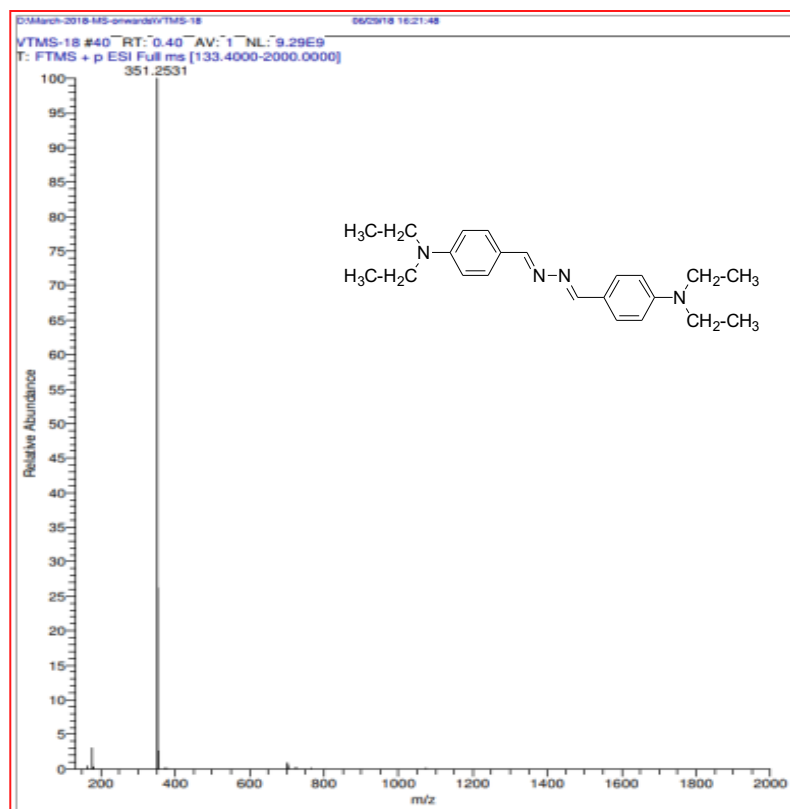

Figure S25. Mass Spectrum of DEBA

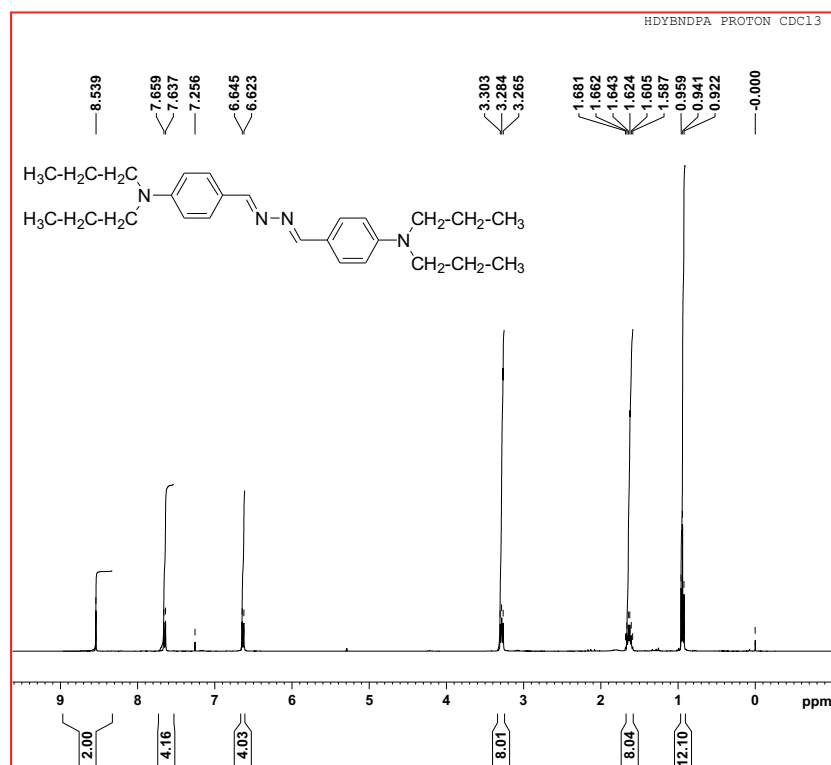

Figure S26. <sup>1</sup>H NMR Spectrum of DPBA in CDCl<sub>3</sub>

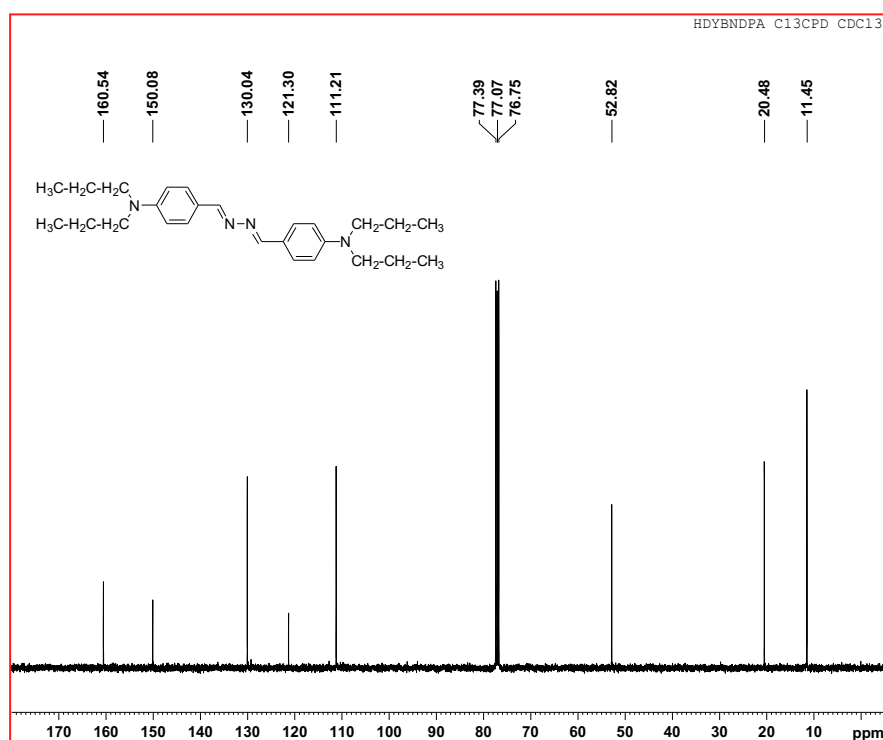

Figure S27. <sup>13</sup>C NMR Spectrum of DPBA in CDCl<sub>3</sub>

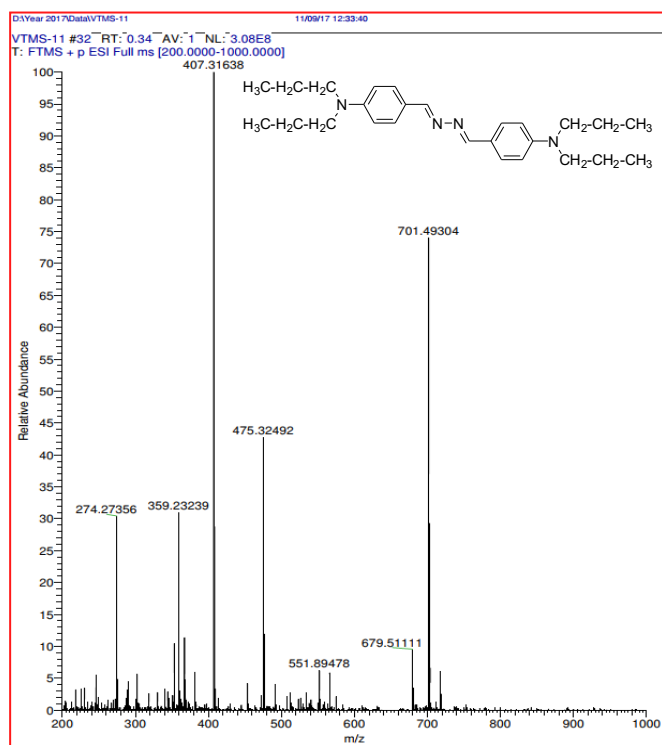

Figure S28. Mass Spectrum of DPBA



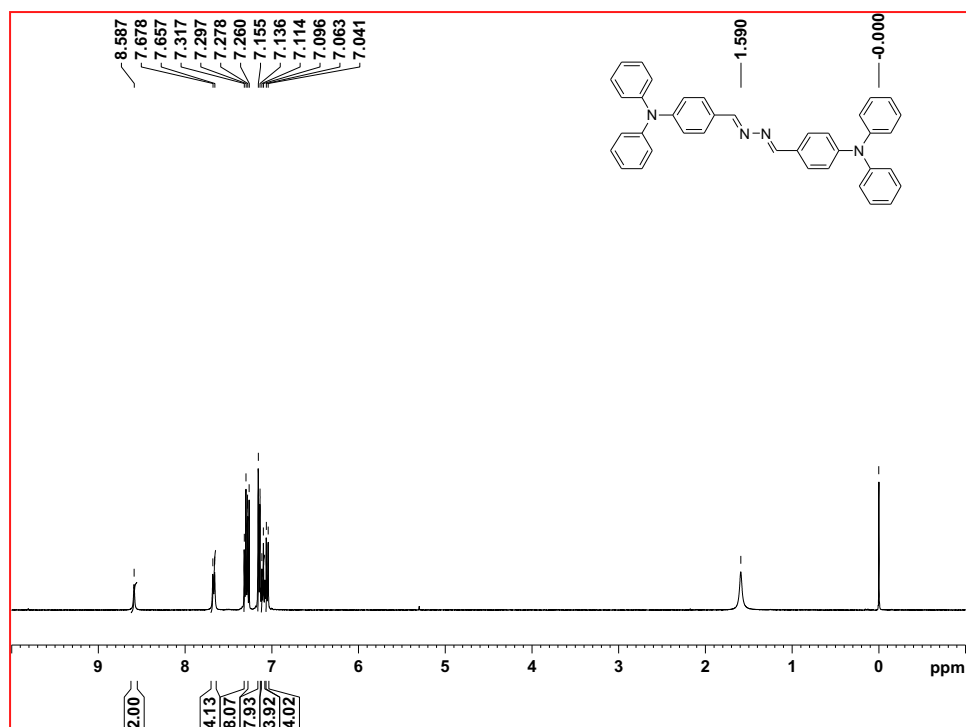

Figure S29. <sup>1</sup>H NMR Spectrum of DAPA in CDCl<sub>3</sub>

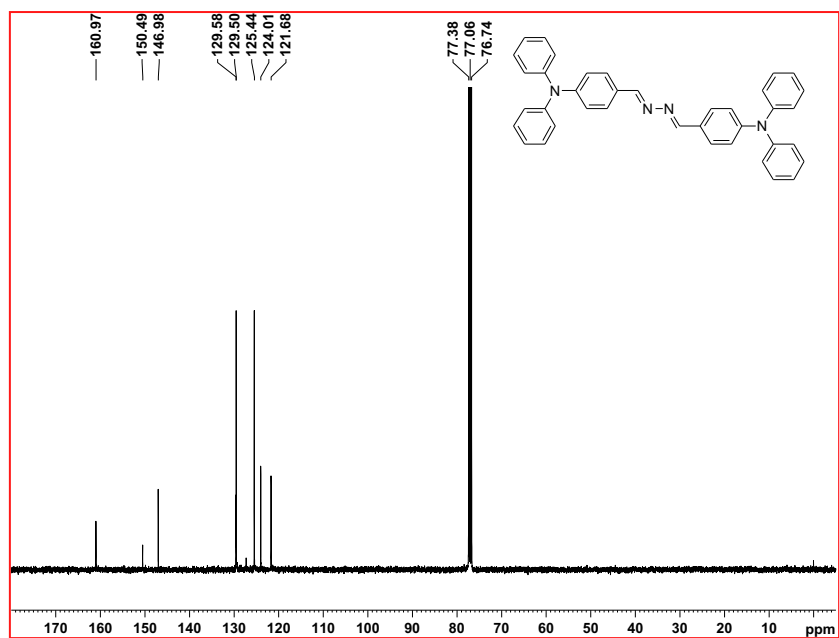

Figure S30. <sup>13</sup>C NMR Spectrum of DAPA in CDCl<sub>3</sub>

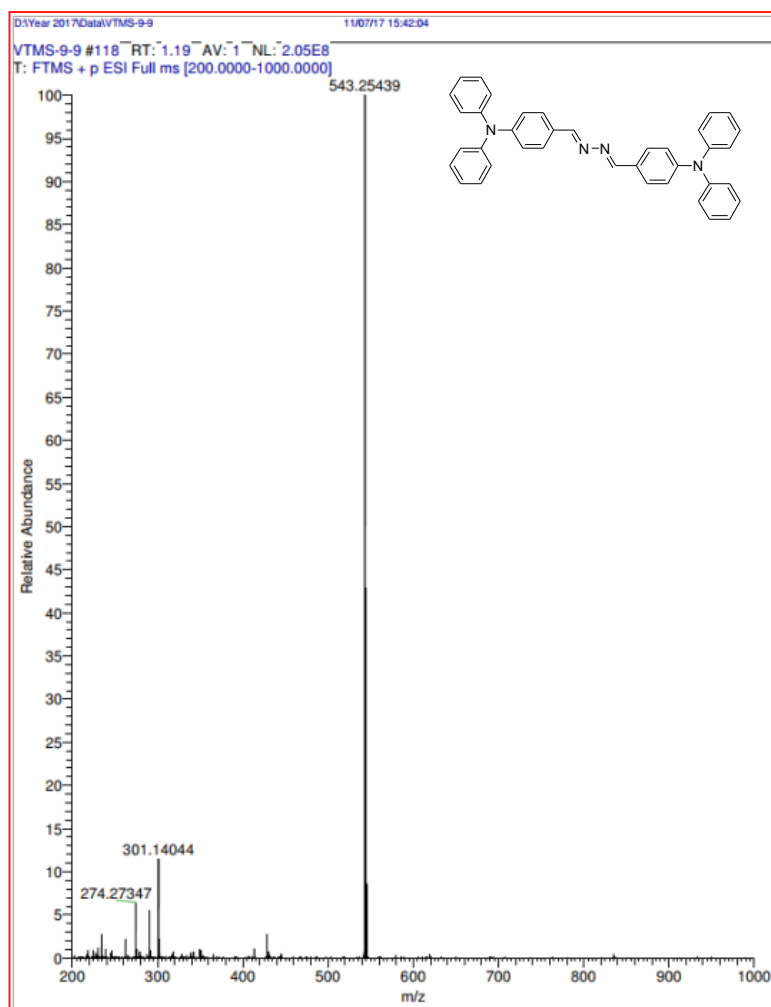

**Figure S31.** Mass Spectrum of DAPA
